# Supplementary material for: Iron oxide nanozymes stabilize stannous fluoride for targeted biofilm killing and synergistic oral disease prevention
Source: PubMed Central journal article supplement (PMC10541875; doi:10.1038/s41467-023-41687-8), 2023-09-29
Supplement: 41467_2023_41687_MOESM1_ESM.pdf [file 41467_2023_41687_MOESM1_ESM.pdf]

## Supplementary Information

### Iron oxide nanozymes stabilize stannous fluoride for targeted biofilm killing and synergistic oral disease prevention

Yue Huang<sup>1,2,3§</sup>, Yuan Liu<sup>2,4§</sup>, Nil Kanatha Pandey<sup>1,2,3§</sup>, Shrey Shah<sup>1,5</sup>, Aurea Simon-Soro<sup>2,3,6</sup>, Jessica C. Hsu<sup>1,5</sup>, Zhi Ren<sup>2,3,7</sup>, Zhenting Xiang<sup>2,3</sup>, Dongyeop Kim<sup>2,3,8</sup>, Tatsuro Ito<sup>2,3,9</sup>, Min Jun Oh<sup>2,3,10</sup>, Christine Buckley<sup>11</sup>, Faizan Alawi<sup>12</sup>, Yong Li<sup>2,3</sup>, Paul J. M. Smeets<sup>13,14</sup>, Sarah Boyer<sup>14</sup>, Xingchen Zhao<sup>14</sup>, Derk Joester<sup>14</sup>, Domenick T. Zero<sup>11</sup>, David P. Cormode<sup>1,5\*</sup>, Hyun Koo<sup>2,3,7\*</sup>

<sup>1</sup>Department of Radiology, Perelman School of Medicine, University of Pennsylvania, Philadelphia, PA, USA

<sup>2</sup>Biofilm Research Labs, Levy Center for Oral Health, School of Dental Medicine, University of Pennsylvania, Philadelphia, PA, USA

<sup>3</sup>Department of Orthodontics and Divisions of Pediatric Dentistry and Community Oral Health, School of Dental Medicine, University of Pennsylvania, Philadelphia, PA, USA

<sup>4</sup>Department of Preventive and Restorative Sciences, School of Dental Medicine, University of Pennsylvania, Philadelphia, PA, USA

<sup>5</sup>Department of Bioengineering, School of Engineering and Applied Sciences, University of Pennsylvania, Philadelphia, PA, USA

<sup>6</sup>Department of Stomatology, Dental School, University of Seville, Spain

<sup>7</sup>Center for Innovation and Precision Dentistry, School of Dental Medicine, School of Engineering and Applied Sciences, University of Pennsylvania, Philadelphia, PA, USA

<sup>8</sup>Department of Preventive Dentistry, School of Dentistry, Jeonbuk National University, Jeonju, Republic of Korea

<sup>9</sup>Department of Pediatric Dentistry, Nihon University School of Dentistry at Matsudo, Chiba, Japan

<sup>10</sup>Department of Chemical and Biomolecular Engineering, University of Pennsylvania, Philadelphia, PA, USA

<sup>11</sup>Department of Cariology, Operative Dentistry and Dental Public Health and Oral Health Research Institute, Indiana University School of Dentistry, Indianapolis, IN, USA

<sup>12</sup>Department of Basic and Translational Sciences, School of Dental Medicine, University of Pennsylvania, Philadelphia, PA, USA

<sup>13</sup>Northwestern University Atomic and Nanoscale Characterization Experimental Center, Northwestern University, Evanston, IL, USA

<sup>14</sup>Department of Materials Science and Engineering, Northwestern University, Evanston, IL, USA

\*Corresponding Authors: Hyun Koo; Email: [koohy@upenn.edu](mailto:koohy@upenn.edu)  
David P. Cormode; Email: [david.cormode@penmedicine.upenn.edu](mailto:david.cormode@penmedicine.upenn.edu)

§These authors contributed equally to this work.

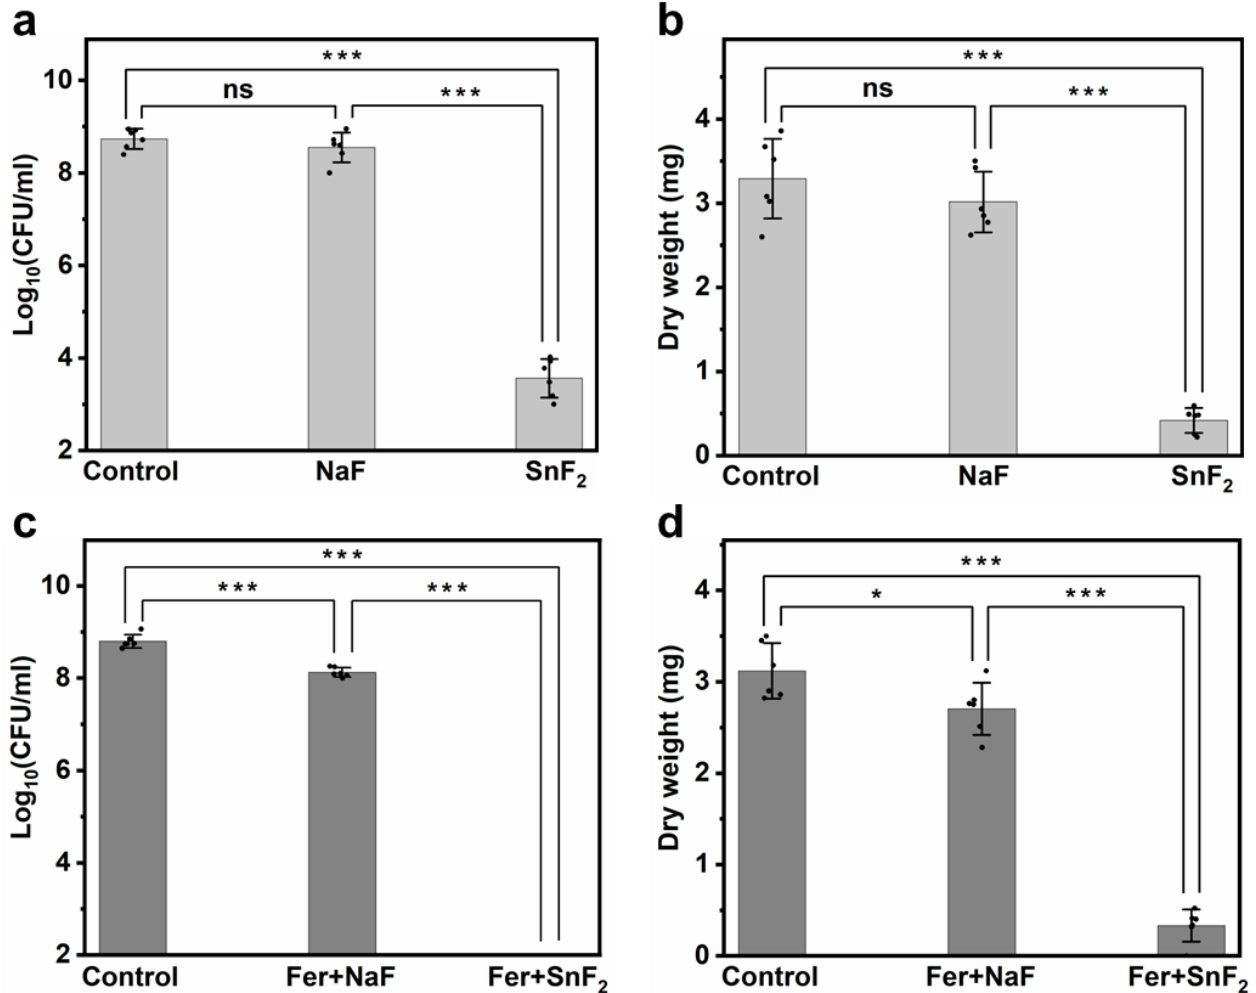

**Supplementary Fig. 1. Antibiofilm studies of NaF and  $\text{SnF}_2$  with or without Fer.** The bacterial viability (a) and the mass of biofilm (b) after treatment with NaF or  $\text{SnF}_2$  at 1000 ppm of F. The bacterial viability (c) and the mass of biofilm (d) after treatment with Fer+NaF or Fer+ $\text{SnF}_2$  at 1 mg of Fe/ml, 1000 ppm of F, and 1% (v/v) of  $\text{H}_2\text{O}_2$ . The data are presented as mean  $\pm$  standard deviation (n=6; 3 independent experiments with two replicates). \* $p < 0.05$ , \*\*\* $p < 0.001$ ; ns, nonsignificant; one-way ANOVA followed by Tukey test. Source data are available as a Source Data file.

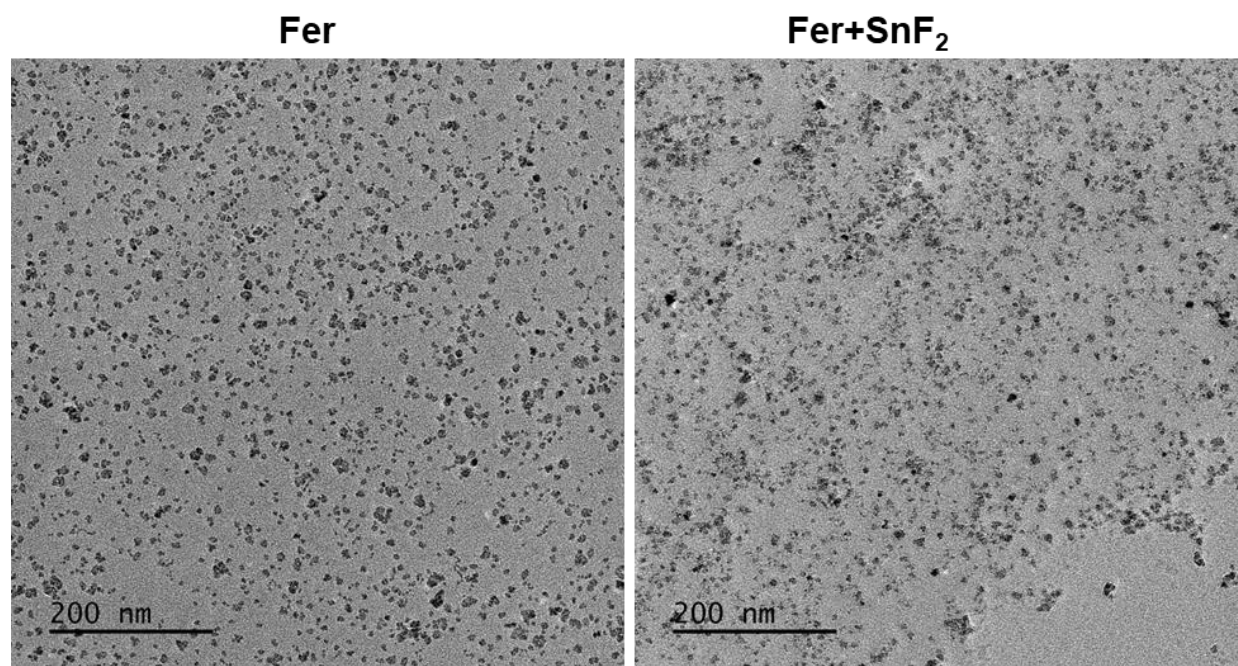

**Supplementary Fig. 2. TEM of Fer and Fer+SnF<sub>2</sub>.** Representative TEM of Fer and Fer+SnF<sub>2</sub> after 1 h incubation in 0.1 M sodium acetate buffer (pH 4.5).

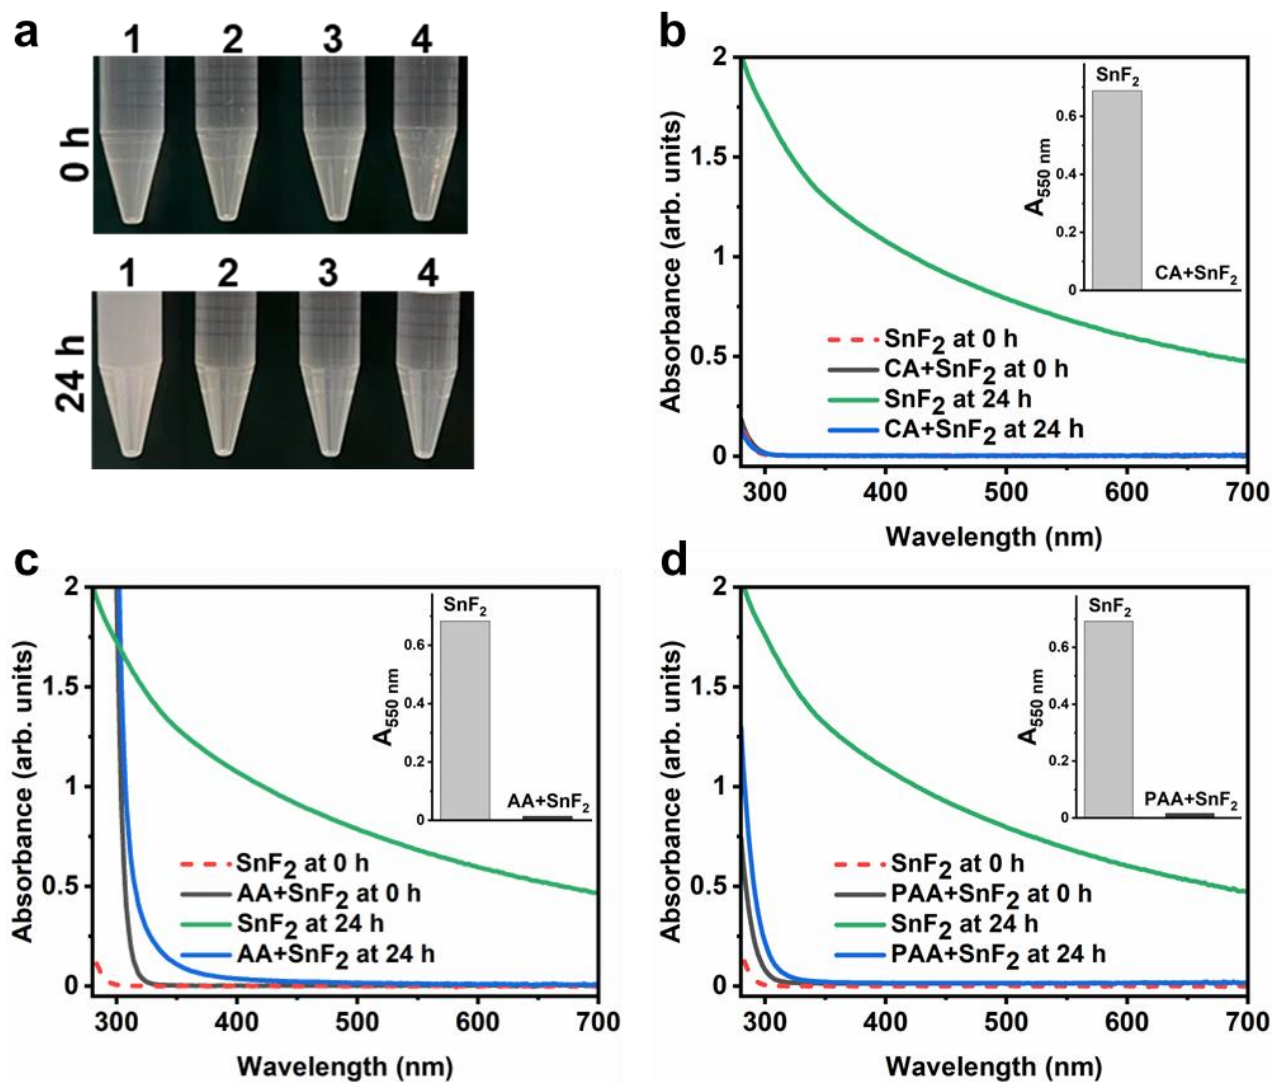

**Supplementary Fig. 3. Stability study of SnF<sub>2</sub> when mixed with different chemicals.** **a** Photographs of SnF<sub>2</sub> in different conditions at pH 4.5 (0.1 M sodium acetate buffer). The samples are: 1. SnF<sub>2</sub> alone, 2. citric acid (CA)+SnF<sub>2</sub>, 3. L-ascorbic acid (AA)+SnF<sub>2</sub>, and 4. poly(acrylic acid) (PAA)+SnF<sub>2</sub>. Top: 0 h; bottom: after 24 h. **b-d** UV-visible absorption spectra of SnF<sub>2</sub> (250 ppm of F) at pH 4.5 (0.1 M sodium acetate buffer) with or without CA (1 mg/ml) (**b**), AA (1 mg/ml) (**c**), and PAA (1 mg/ml) (**d**) at the time points indicated. Insets show the absorbance of SnF<sub>2</sub> with or without CA (**b**), AA (**c**), and PAA (**d**) at 550 nm after 24 h incubation as a measure of turbidity. Source data are available as a Source Data file.

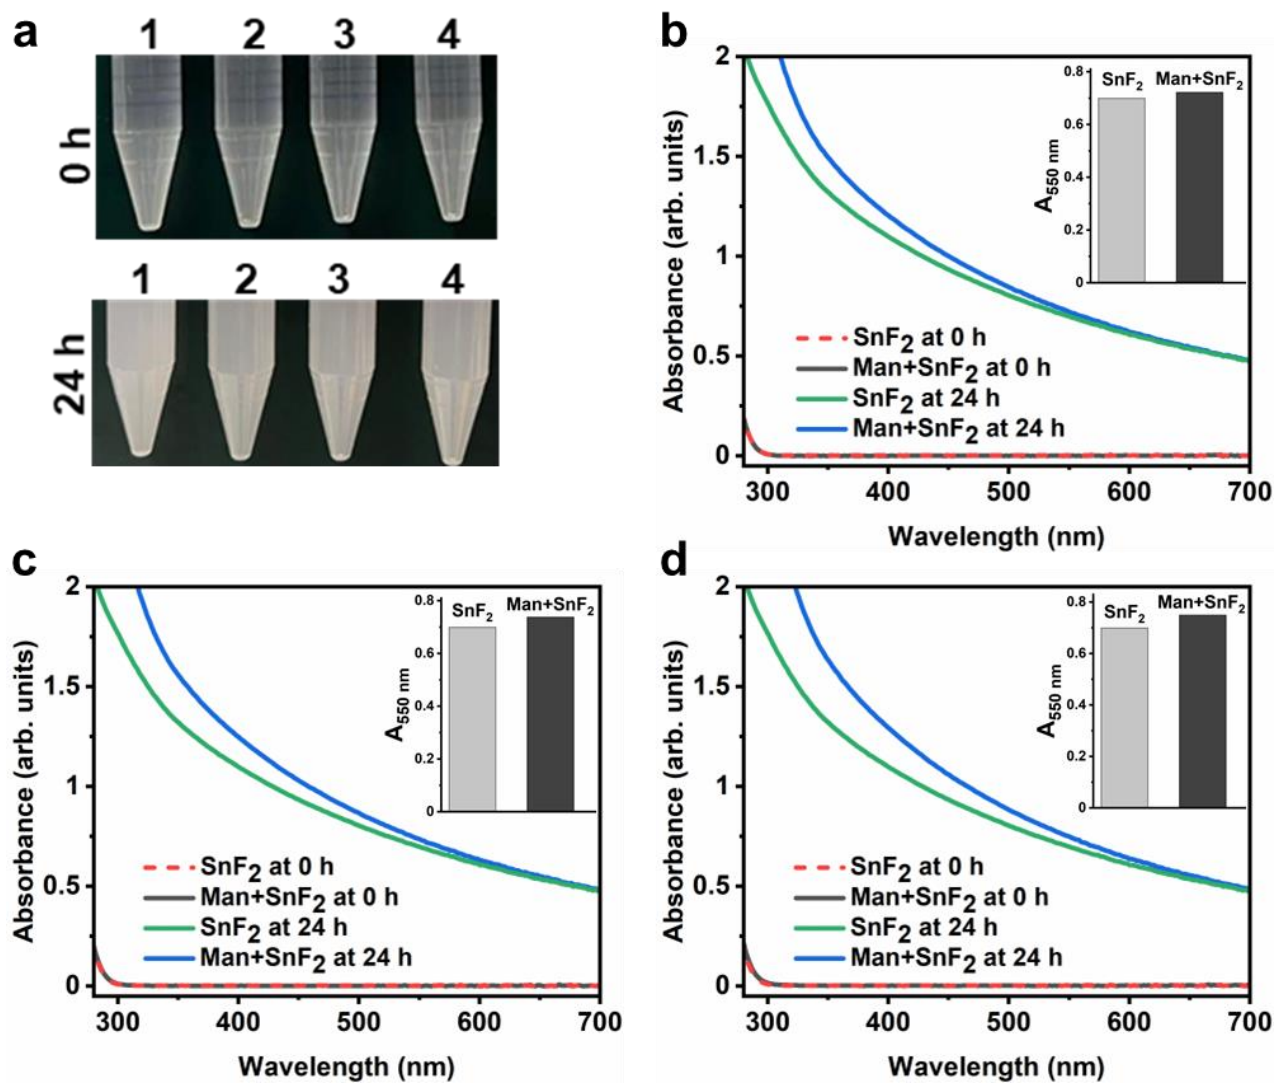

**Supplementary Fig. 4. Stability study of SnF<sub>2</sub> in the presence of various amounts of mannitol.**

**a** Photographs of SnF<sub>2</sub> with various amounts of mannitol (Man) at pH 4.5 (0.1 M sodium acetate buffer) after 0 or 24 h incubation. The samples are: 1. SnF<sub>2</sub> alone, 2. 1 mg/ml of Man+SnF<sub>2</sub>, 3. 2 mg/ml of Man+SnF<sub>2</sub>, and 4. 10 mg/ml of Man+SnF<sub>2</sub>. The concentration of SnF<sub>2</sub> was 250 ppm of F. Top: 0 h; bottom: after 24 h. **b-d** UV-visible absorption spectra of SnF<sub>2</sub> at pH 4.5 (0.1 M sodium acetate buffer) with or without 1 mg/ml (**b**), 2 mg/ml (**c**), and 10 mg/ml (**d**) of Man at the time points indicated. Insets show the absorbance of SnF<sub>2</sub> with or without 1 mg/ml (**b**), 2 mg/ml (**c**), and 10 mg/ml (**d**) of Man at 550 nm after 24 h incubation as a measure of turbidity. Source data are available as a Source Data file.

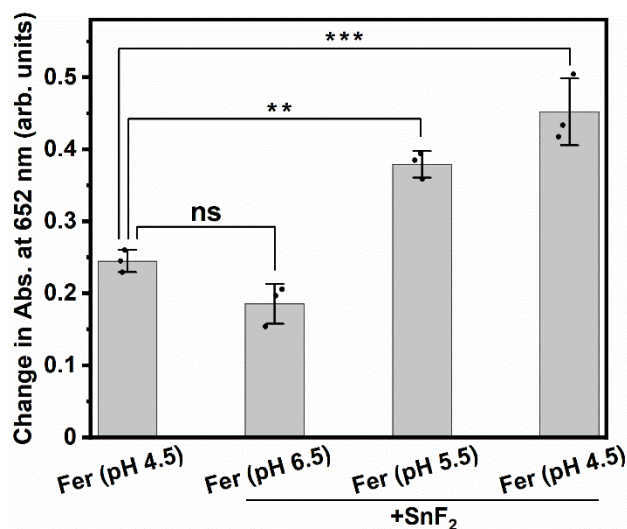

**Supplementary Fig. 5. Comparison of catalytic activities of Fer+SnF<sub>2</sub> prepared at different pH values.** Briefly, Fer was incubated with SnF<sub>2</sub> for 1 h at three different pH (4.5, 5.5, and 6.5; 0.1 M sodium acetate buffer) and washed three times with respective buffers using ultrafiltration tubes (3 kDa MWCO). Subsequently, the pellets were resuspended in a volume equal to the volume of the filtrate. All the catalytic activities were then determined (5 min incubation in the presence of 1% of H<sub>2</sub>O<sub>2</sub>) using TMB assay in 0.1 M sodium acetate buffer at pH 4.5. For the purpose of comparison, Fer alone (incubated at pH 4.5) was treated in a similar way. The data are presented as mean ± standard deviation (n=3 independent experiments). \*\**p* < 0.01, \*\*\**p* < 0.001; ns, nonsignificant; one-way ANOVA followed by Tukey test. Source data are available as a Source Data file.

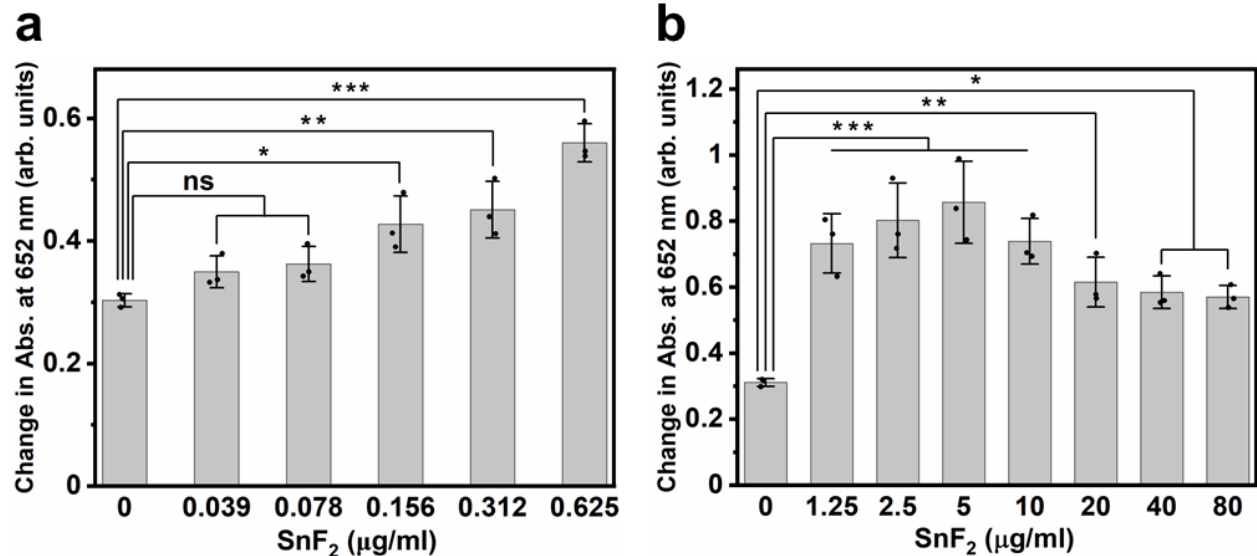

**Supplementary Fig. 6. Study of various concentrations of SnF<sub>2</sub> on the catalytic activity of Fer.** Effect of 0.039-0.625 µg/ml (**a**) and 1.25-80 µg/ml (**b**) of SnF<sub>2</sub> on the catalytic activity of Fer (20 µg of Fe/ml) in 0.1 M sodium acetate buffer (pH 4.5), as assessed by TMB colorimetric assay. 0 µg/ml indicates Fer alone. The data are presented as mean ± standard deviation (n=3 independent experiments). \**p* < 0.05, \*\**p* < 0.01, \*\*\**p* < 0.001; ns, nonsignificant; one-way ANOVA followed by Tukey test. Source data are available as a Source Data file.

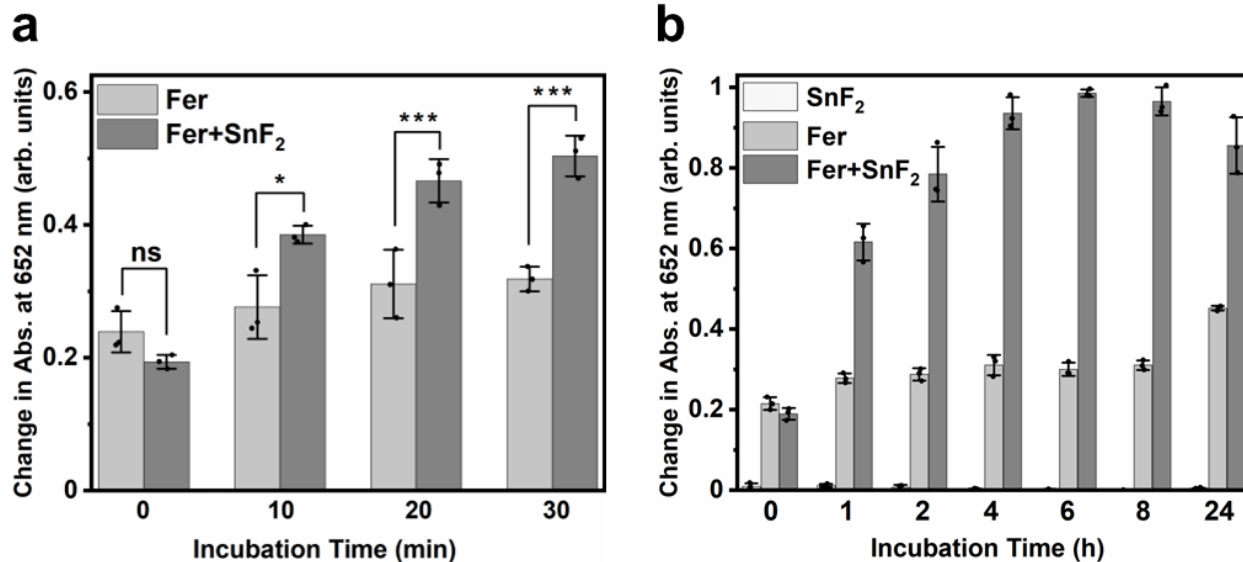

**Supplementary Fig. 7. Evaluation of incubation time on the catalytic activity of Fer when mixed with SnF<sub>2</sub>.** **a, b** Effect of incubation time on the catalytic activity of Fer (20 µg of Fe/ml) with or without SnF<sub>2</sub> (20 µg/ml) in 0.1 M sodium acetate buffer (pH 4.5), as assessed by TMB colorimetric assay. The increase in absorbance at 652 nm shows ROS production. The data are presented as mean ± standard deviation (n=3 independent experiments). \**p* < 0.05, \*\*\**p* < 0.001; ns, nonsignificant; one-way ANOVA followed by Tukey test. Source data are available as a Source Data file.



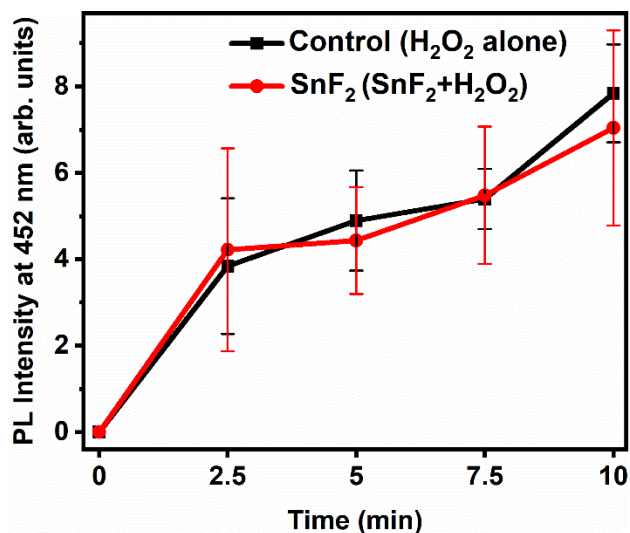

**Supplementary Fig. 8. Evaluation of hydroxyl radical ( $\bullet\text{OH}$ ) production by SnF<sub>2</sub>.** Change in PL intensity of 7-hydroxycoumarin at 452 nm as a function of time with or without SnF<sub>2</sub> (20  $\mu\text{g}/\text{ml}$ ). The data are presented as mean  $\pm$  standard deviation (n=5 independent experiments). Source data are available as a Source Data file.

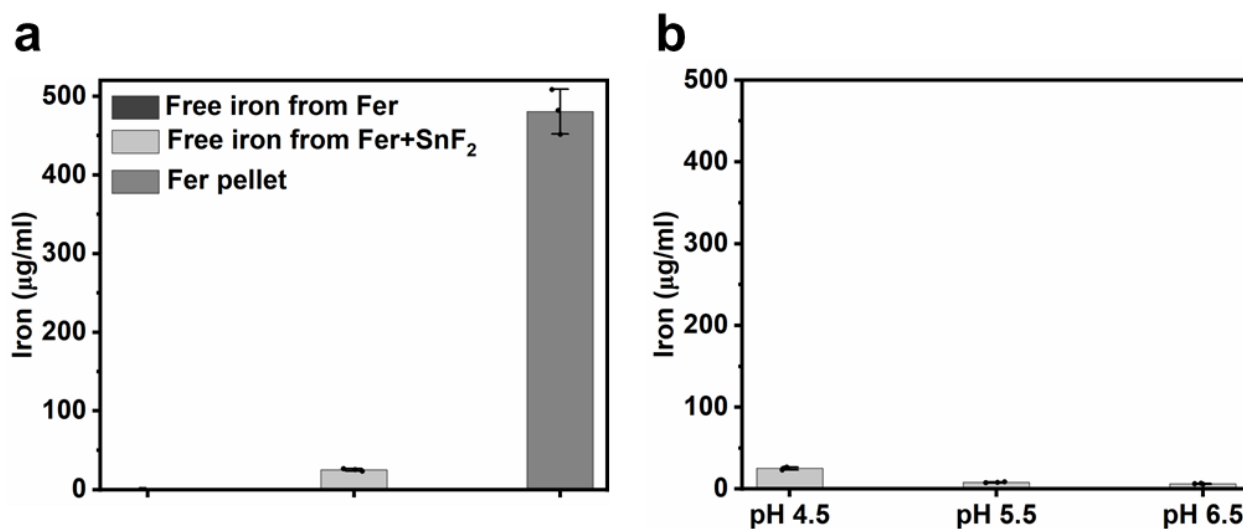

**Supplementary Fig. 9. Iron release study.** **a** Concentration of iron released from Fer (0.5 mg of Fe/ml) at pH 4.5 after 1 h incubation in the absence of SnF<sub>2</sub>, presence of SnF<sub>2</sub> (0.5 mg/ml), and after the dissolution of the pellet in a volume equal to the volume of the filtrate, as determined by ICP-OES. **b** Concentration of iron released from Fer (0.5 mg of Fe/ml) in the presence of SnF<sub>2</sub> (0.5 mg/ml) during incubation at the indicated pH for 1 h. The data are presented as mean  $\pm$  standard deviation (n=3 independent experiments). Source data are available as a Source Data file.

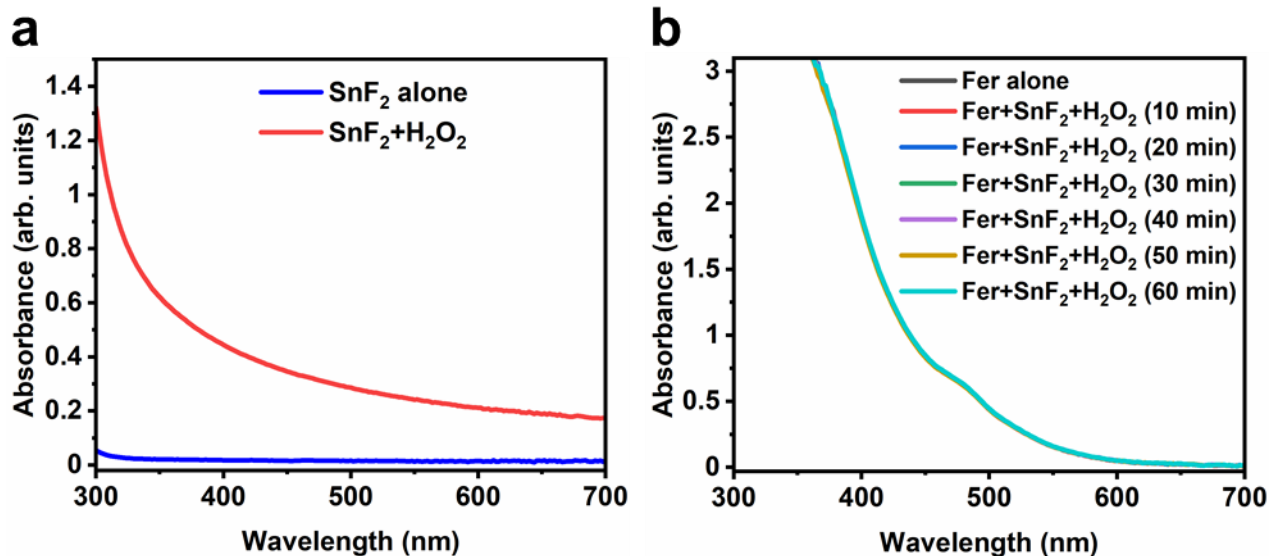

**Supplementary Fig. 10. Stability study of SnF<sub>2</sub> with or without Fer after H<sub>2</sub>O<sub>2</sub> treatment. a** Representative UV-visible absorption spectra of SnF<sub>2</sub> with or without H<sub>2</sub>O<sub>2</sub> (10 min incubation) in 0.1 M sodium acetate buffer (pH 4.5). The addition of H<sub>2</sub>O<sub>2</sub> resulted in a noticeable increase in the absorption spectrum of SnF<sub>2</sub>, indicating the oxidation of SnF<sub>2</sub> by H<sub>2</sub>O<sub>2</sub>. **b** Representative UV-visible absorption spectra of Fer in combination with SnF<sub>2</sub> in the presence of H<sub>2</sub>O<sub>2</sub> at different time points, as indicated, in 0.1 M sodium acetate buffer (pH 4.5). The absorption spectra of Fer+SnF<sub>2</sub>, upon incubation with H<sub>2</sub>O<sub>2</sub> at various time points, do not change appreciably when compared to Fer alone, even after 60 min of catalysis, suggesting Fer may prevent oxidation of SnF<sub>2</sub>. Source data are available as a Source Data file.

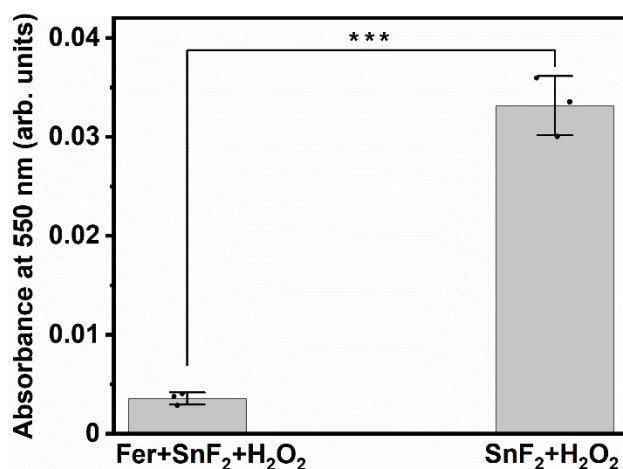

**Supplementary Fig. 11. Stability study of SnF<sub>2</sub> with or without Fer after H<sub>2</sub>O<sub>2</sub> treatment.**

Comparison of the absorbance of SnF<sub>2</sub> (0.1 mg/ml) at 550 nm in the presence of H<sub>2</sub>O<sub>2</sub> (0.1%, v/v) with or without Fer (0.1 mg of Fe/ml) in 0.1 M sodium acetate buffer (pH 4.5). The absorbance of Fer was used as the background for the Fer+SnF<sub>2</sub>+H<sub>2</sub>O<sub>2</sub> group. The absorbance measurements were taken after 1 h incubation in the presence of H<sub>2</sub>O<sub>2</sub>. The data are presented as mean ± standard deviation (n=3 independent experiments). \*\*\**p* < 0.001; one-way ANOVA followed by Tukey test. Source data are available as a Source Data file.

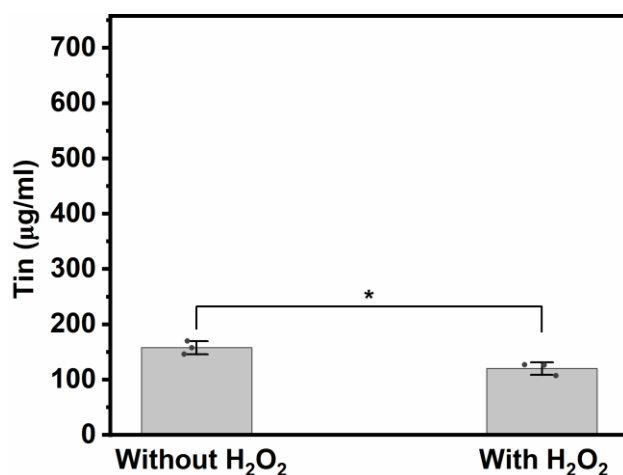

**Supplementary Fig. 12. Assessment of free tin ions before and after H<sub>2</sub>O<sub>2</sub> treatment.**

Comparison of the concentration of free tin ions in the filtrate when SnF<sub>2</sub> (1 mg/ml) was mixed with Fer (1 mg of Fe/ml) in 0.1 M sodium acetate buffer (pH 4.5) after 10 min incubation in the absence and presence of H<sub>2</sub>O<sub>2</sub> (1%, v/v), as determined by ICP-OES. The data are presented as mean ± standard deviation (n=3 independent experiments). \**p* < 0.05; one-way ANOVA followed by Tukey test. Source data are available as a Source Data file.

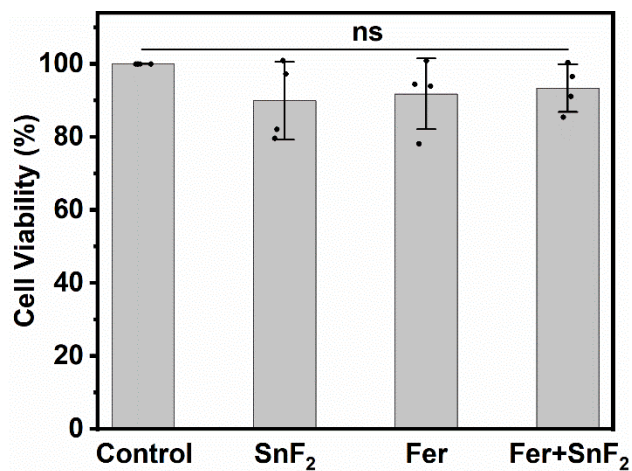

**Supplementary Fig. 13. *In vitro* biocompatibility study via MTS assay.** Effect of the combined treatment of Fer (1 mg of Fe/ml) and SnF<sub>2</sub> (250 ppm of F) on the cell viability of HGK cells. The data are presented as mean  $\pm$  standard deviation (n=4 independent experiments). ns, nonsignificant; one-way ANOVA followed by Tukey test. Source data are available as a Source Data file.

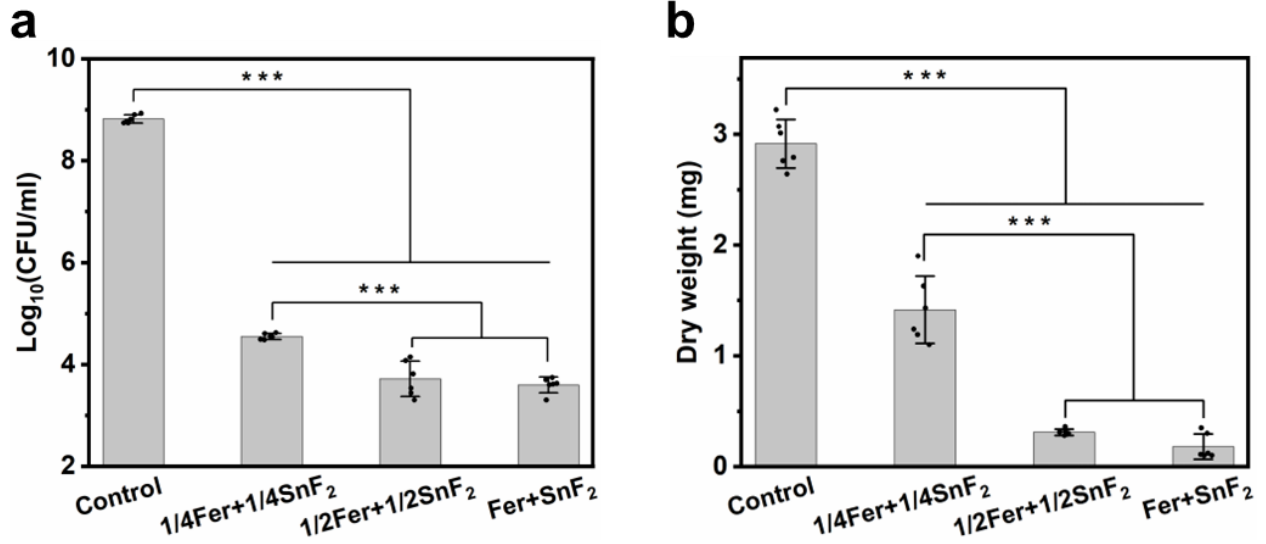

**Supplementary Fig. 14. Antibiofilm study of the combined treatment of Fer and SnF<sub>2</sub> at different concentrations.** The bacterial viability (a) and biofilm mass (b) with the varied concentration of Fer (0-1 mg of Fe/ml) and SnF<sub>2</sub> (0-250 ppm of F). 1/4Fer, 1/2Fer, and Fer indicate 0.25 mg of Fe/ml, 0.5 mg of Fe/ml, and 1 mg of Fe/ml, respectively. Similarly, 1/4SnF<sub>2</sub>, 1/2SnF<sub>2</sub>, and SnF<sub>2</sub> indicate 62.5 ppm of F, 125 ppm of F, and 250 ppm of F, respectively. The data are presented as mean ± standard deviation (n=6; 3 independent experiments with two replicates). \*\*\**p* < 0.001; one-way ANOVA followed by Tukey test. Source data are available as a Source Data file.

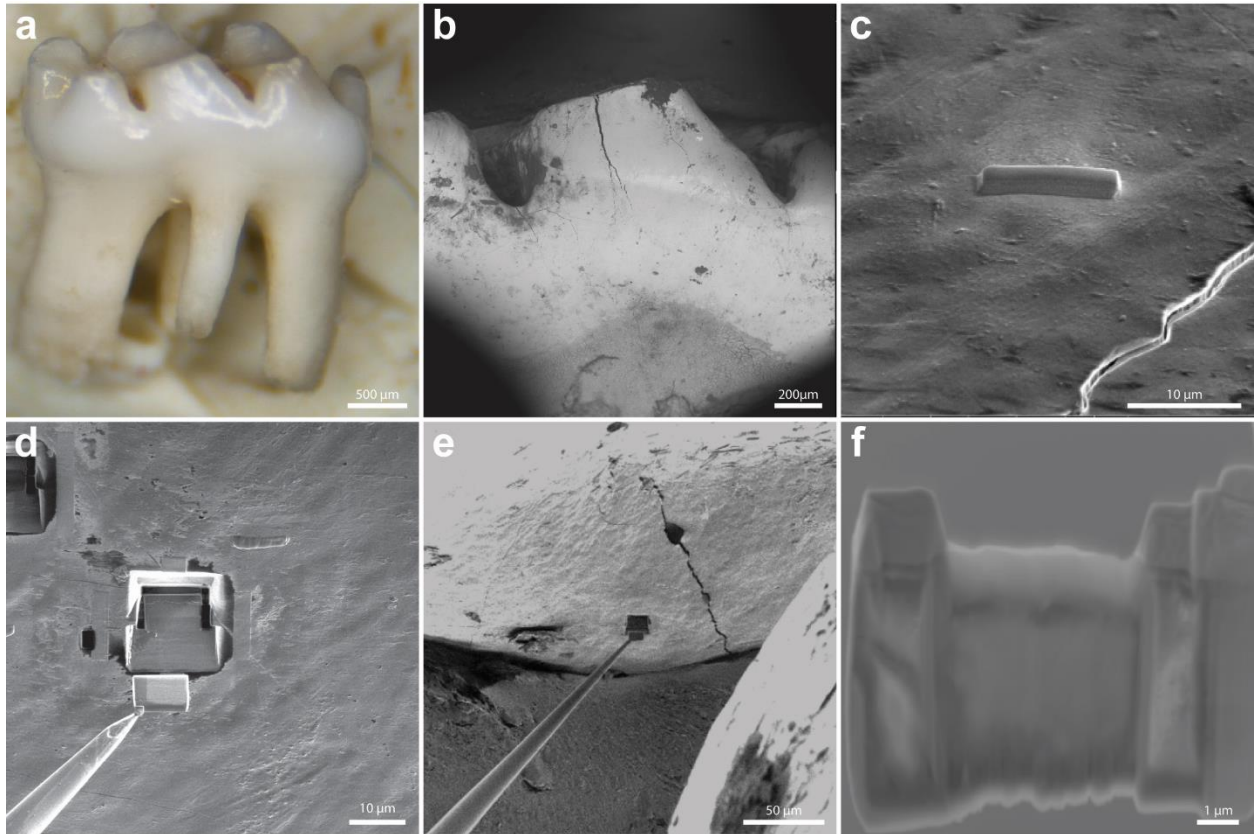

**Supplementary Fig. 15. Workflow for lift-out and thinning of lamellae from M1 rat molars for analysis by STEM-EDS and STEM-EELS.** **a** Buccal aspect of whole M1 molar. **b** SEM image of the middle cusp of molar in **(a)**. **c** SEM image of enamel surface after deposition of a protective strap of FIB-Pt. **d, e** SEM images of enamel surface with lamella attached to micro-manipulator after lift-out. **f** SEM image of lamella after thinning.

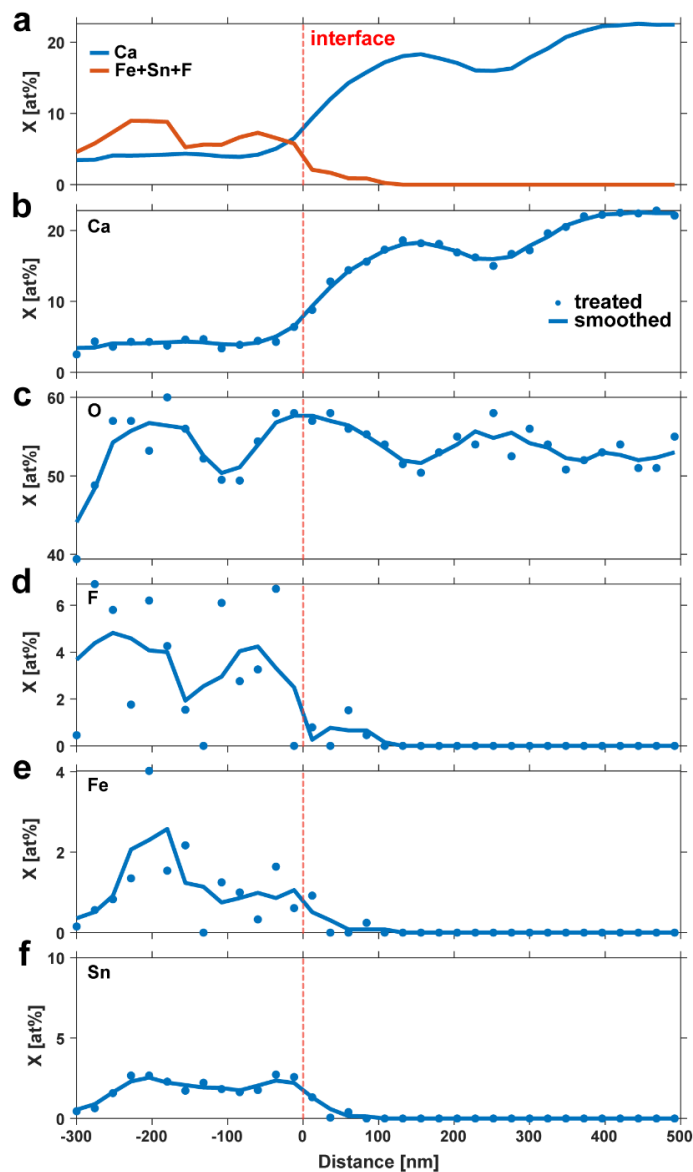

**Supplementary Fig. 16. Elemental composition of the surface of a rat M1 molar treated with  $\text{Fe}+\text{SnF}_2$  as assessed by STEM-EELS. a-f** Plot of the mean mole fraction of Ca (blue line), and of the sum of the mean mole fractions of Fe, Sn, and F (red line, **a**), and plot of mean mole fractions of Ca (**b**), O (**c**), F (**d**), Fe (**e**), and Sn (**f**) vs. distance in the direction normal to the EES. The distance axis is referenced to the approximate position of the interface between the Fe/Sn/F-rich layer and the underlying enamel. For **b-f**, solid circles indicate the mean mole fraction at a given distance, and lines indicate the moving average of the mole fraction with span 3 (denoted as “smoothed” in legend). Note that the data shown here was generated from a separately prepared sample extracted from the same tooth shown in Fig. 5f. Source data are available as a Source Data file.

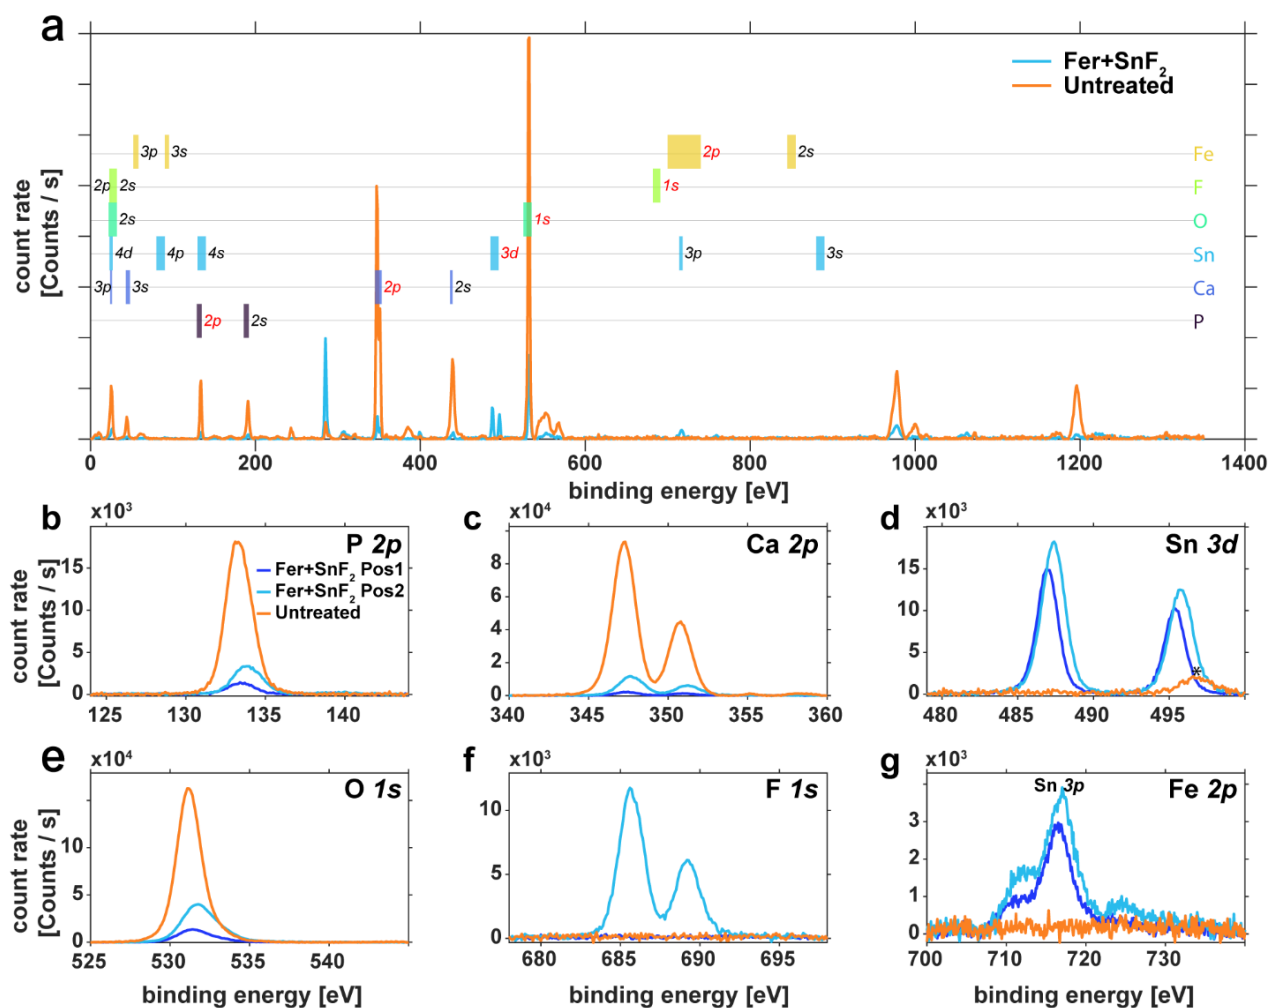

**Supplementary Fig. 17. Example XPS spectra of mature rat molar enamel.** **a** Survey spectra of teeth from Fer+SnF<sub>2</sub>-treated (blue, after a sputtering time of  $t_s = 1000$  s) and untreated (orange,  $t_s = 0$  s) animals. Colored bands indicate binding energy ranges for selected elements. **b-g** Detailed, background-corrected spectra for the P 2*p* (**b**), Ca 2*p* (**c**), Sn 3*d* (**d**), O 1*s* (**e**), F 1*s* (**f**), and Fe 2*p* (**g**) spectral lines recorded on opposite sides of a maxillary molar of a Fer+SnF<sub>2</sub>-treated animal (Pos 1, dark blue; Pos 2, light blue;  $t_s = 1000$  s), and at the surface of a tooth from an untreated animal (untreated, orange). Note that the feature at ~496 keV in the untreated sample in (**d**) likely corresponds to the NaKL1 line (asterisk) and that the Sn 3*p* and Fe 2*p* lines overlap (**g**). For quantification, the contribution of the Fe 2*p* line was isolated by fitting both lines. Source data are available as a Source Data file.



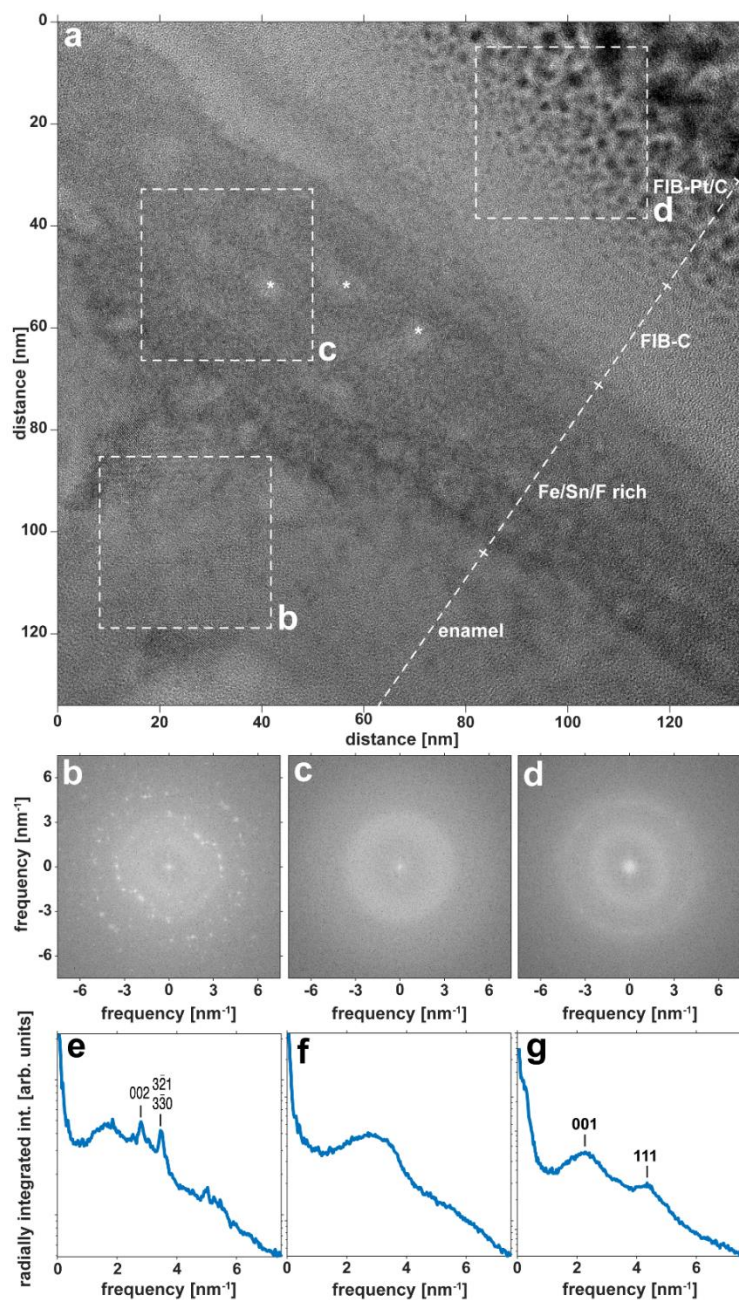

**Supplementary Fig. 18. HRTEM analysis of coating on treated rat molars. a** HRTEM image. Note that likely some beam damage is apparent in the Fe/Sn/F-rich layer (asterisks). **b-d** Magnitude of 2D Fast Fourier Transforms (FFTs) of areas indicated in (a). **e-g** Plots of radial integrals of FFTs (**e**) in (b), (**f**) in (c), and (**g**) in (d). Spatial frequencies consistent with d-spacing for the {002}, {3 $\bar{2}$ 1}, and {3 $\bar{3}$ 0} sets of planes of hydroxylapatite are indicated in (e), and those consistent with d-spacing for the {001} and {111} sets of planes in Pt are indicated in (g). Source data are available as a Source Data file.

**Supplementary Table 1. Hydrodynamic diameter (in nm) of Fer with or without SnF<sub>2</sub> in DI water at various incubation times.** The data are presented as mean  $\pm$  standard deviation. The mean and standard deviation were calculated from the three means.

| Incubation Time (h) | Fer             | Fer+SnF <sub>2</sub> |
|---------------------|-----------------|----------------------|
| 0                   | 35.0 $\pm$ 0.16 | 26.0 $\pm$ 5.3       |
| 1                   | 34.4 $\pm$ 1.3  | 28.7 $\pm$ 1.4       |
| 2                   | 32.9 $\pm$ 0.42 | 41.0 $\pm$ 2.7       |
| 4                   | 35.0 $\pm$ 3.3  | 33.9 $\pm$ 2.0       |
| 6                   | 34.1 $\pm$ 1.7  | 38.3 $\pm$ 1.3       |
| 24                  | 31.9 $\pm$ 0.43 | 34.1 $\pm$ 0.11      |

**Supplementary Table 2. Zeta potential (in mV) of Fer with or without SnF<sub>2</sub> in DI water at various incubation times.** The data are presented as mean  $\pm$  standard deviation. The mean and standard deviation were calculated from three means.

| Incubation Time (h) | Fer             | Fer+SnF <sub>2</sub> |
|---------------------|-----------------|----------------------|
| 0                   | -48.5 $\pm$ 1.4 | -10.5 $\pm$ 0.84     |
| 1                   | -42.0 $\pm$ 4.1 | -11.0 $\pm$ 1.1      |
| 2                   | -42.8 $\pm$ 7.3 | -10.6 $\pm$ 0.92     |
| 4                   | -45.7 $\pm$ 2.1 | -10.6 $\pm$ 0.73     |
| 6                   | -41.1 $\pm$ 5.0 | -10.1 $\pm$ 0.61     |
| 24                  | -39.4 $\pm$ 2.5 | -11.8 $\pm$ 1.2      |
